# Supplementary material for: Measuring Vegetation Heights and Their Seasonal Changes in the Western Namibian Savanna Using Spaceborne Lidars
Source: MDPI journal article supplement (doi:10.3390/rs14122928), 2022-06-19
Supplement: s1 [file s1]

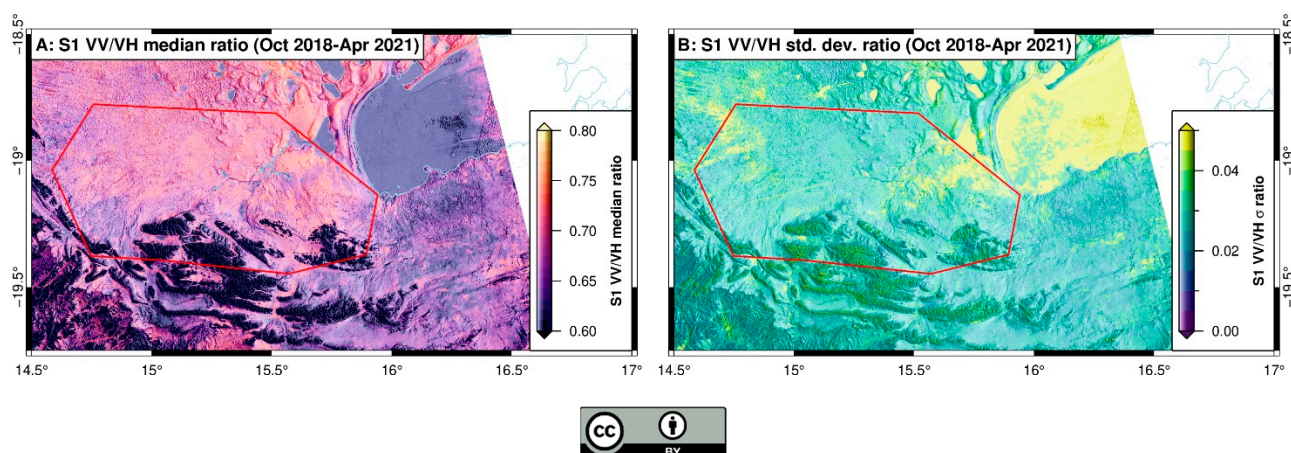

**Copyright:** © 2022 by the authors. Licensee MDPI, Basel, Switzerland. This article is an open access article distributed under the terms and conditions of the Creative Commons Attribution (CC BY) license (<https://creativecommons.org/licenses/by/4.0/>).

**Figure S1.** (A) Sentinel 1 median polarization ratio (VV/VH) averaged from October 2018 to April 2021. (B) Sentinel 1 standard deviation polarization ratio (VV/VH) averaged from October 2018 to April 2021. Polarization ratios indicate the amount of depolarization usually associated with scattering on vegetation, especially trees.

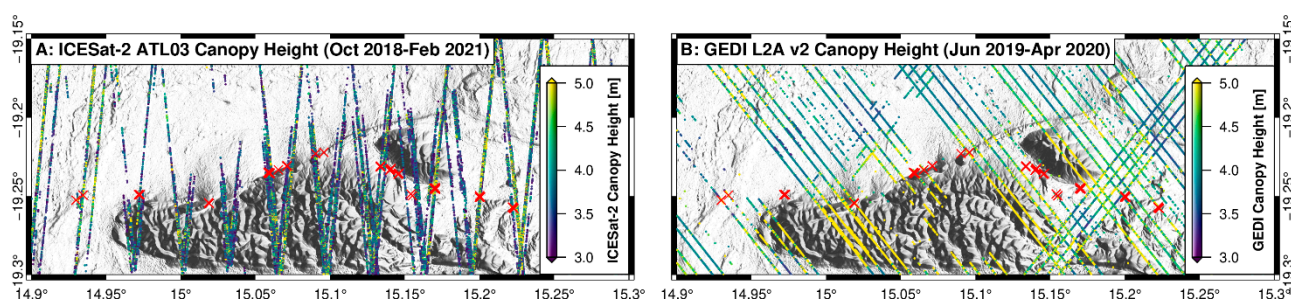

**Figure S2.** ICESat-2 and GEDI ground tracks for the area where field-based tree measurements were taken. Red crosses indicate the 55 field-based tree height measurements of different species for validation. Red polygon outlines study area including more densely vegetated mountainous terrain and blue polygon is limited to the low-slope, sparsely vegetated savanna ecosystem. (B) Canopy height measurements taken from GEDI product L2A (version 2).

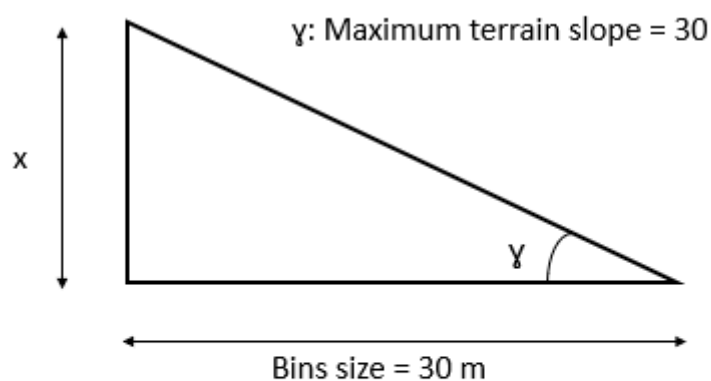

$$x = \text{Bins size} * \tan(\pi/180 * \text{Maximum terrain slope})$$

$$x = 30 * \tan(\pi/180 * 30)$$

**Figure S3.** Filtering threshold based on the bin sizes and the maximum terrain slope

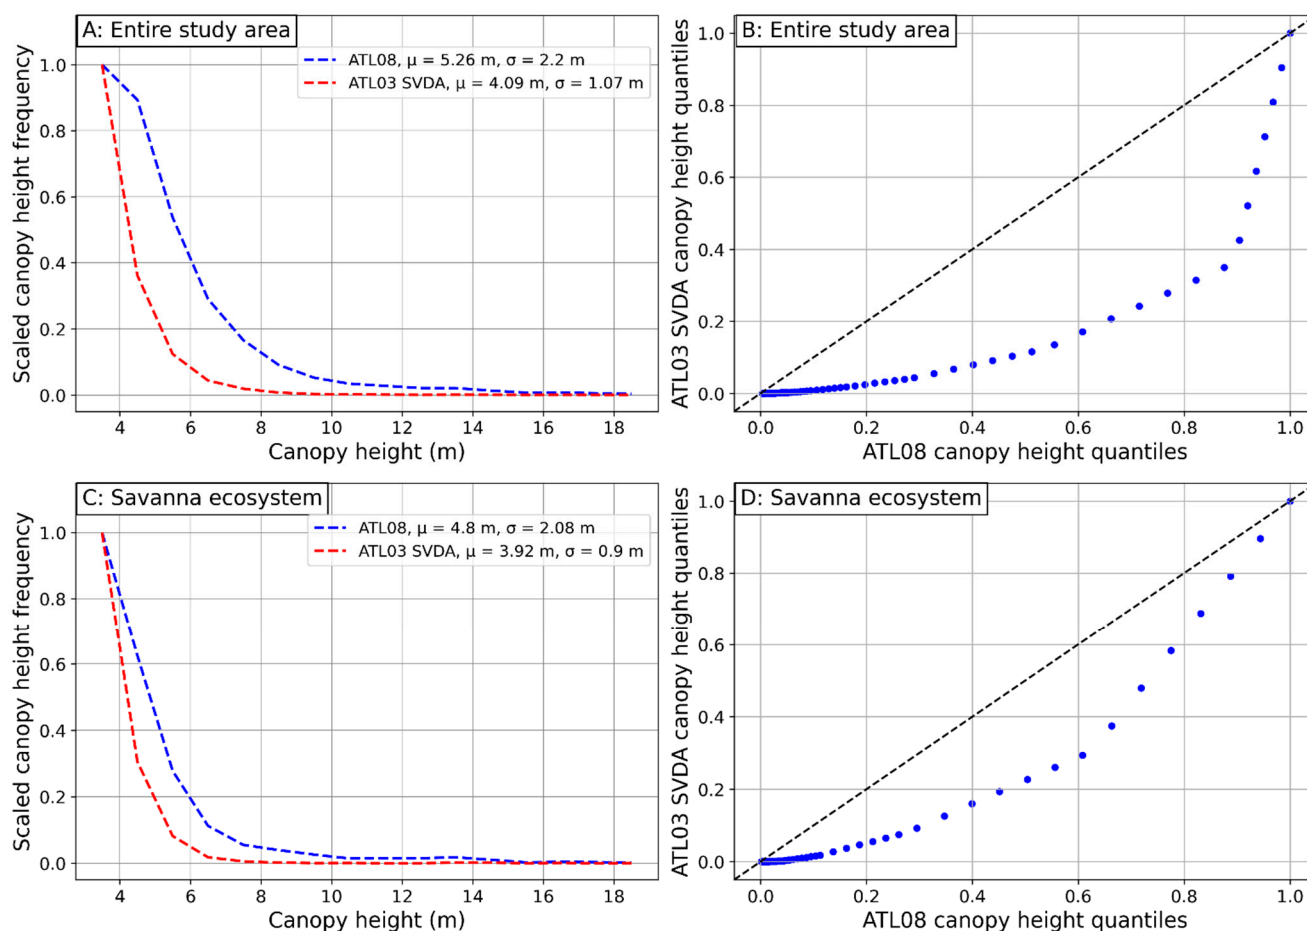

**Figure S4.** ATL03 SVDA and ATL08 canopy height comparison. (A+C) ATL03 SVDA and ATL08 full canopy height distributions in the study areas shown red and blue polygons in Figure 1B+C and Figure 2 in the main manuscript. (B+D) Quantile-quantile plots of ATL03 SVDA and ATL08 canopy height in the study areas.

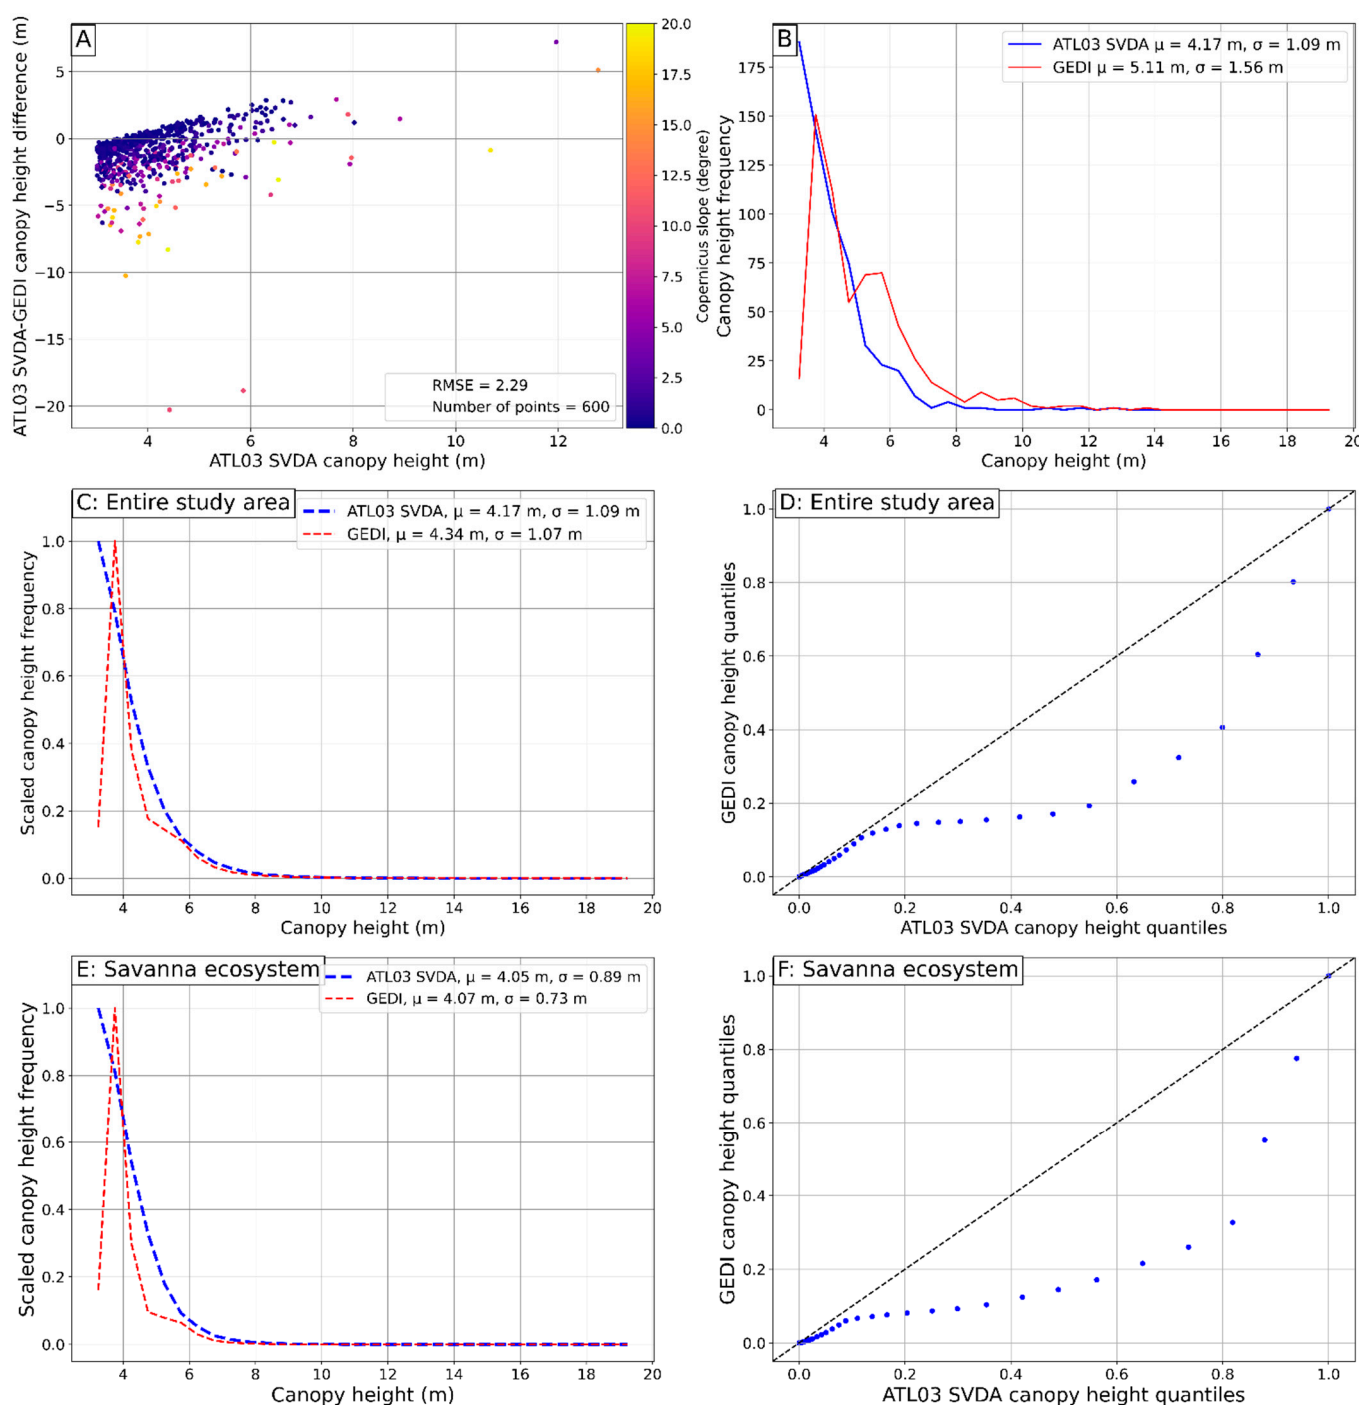

**Figure S5.** GEDI L2A version 2 and ATL03 SVDA canopy height relationship (A) GEDI L2A version 2 and ATL03 SVDA canopy height difference of the 600 overlapping measurements within a buffer of 5 m. (B) ATL03 SVDA and GEDI L2A distributions of the 600 overlapping measurements within a buffer of 5 m. (C+E) ATL03 SVDA and GEDI L2A full canopy height distributions in the study areas shown red and blue polygons in Figure 1B+C and Figure 2 in the main manuscript. (D+F) Quantile-quantile plots of ATL03 SVDA and GEDI L2A canopy height in the study areas. GEDI L2A canopy heights are generally lower than ATL03 SVDA canopy heights.

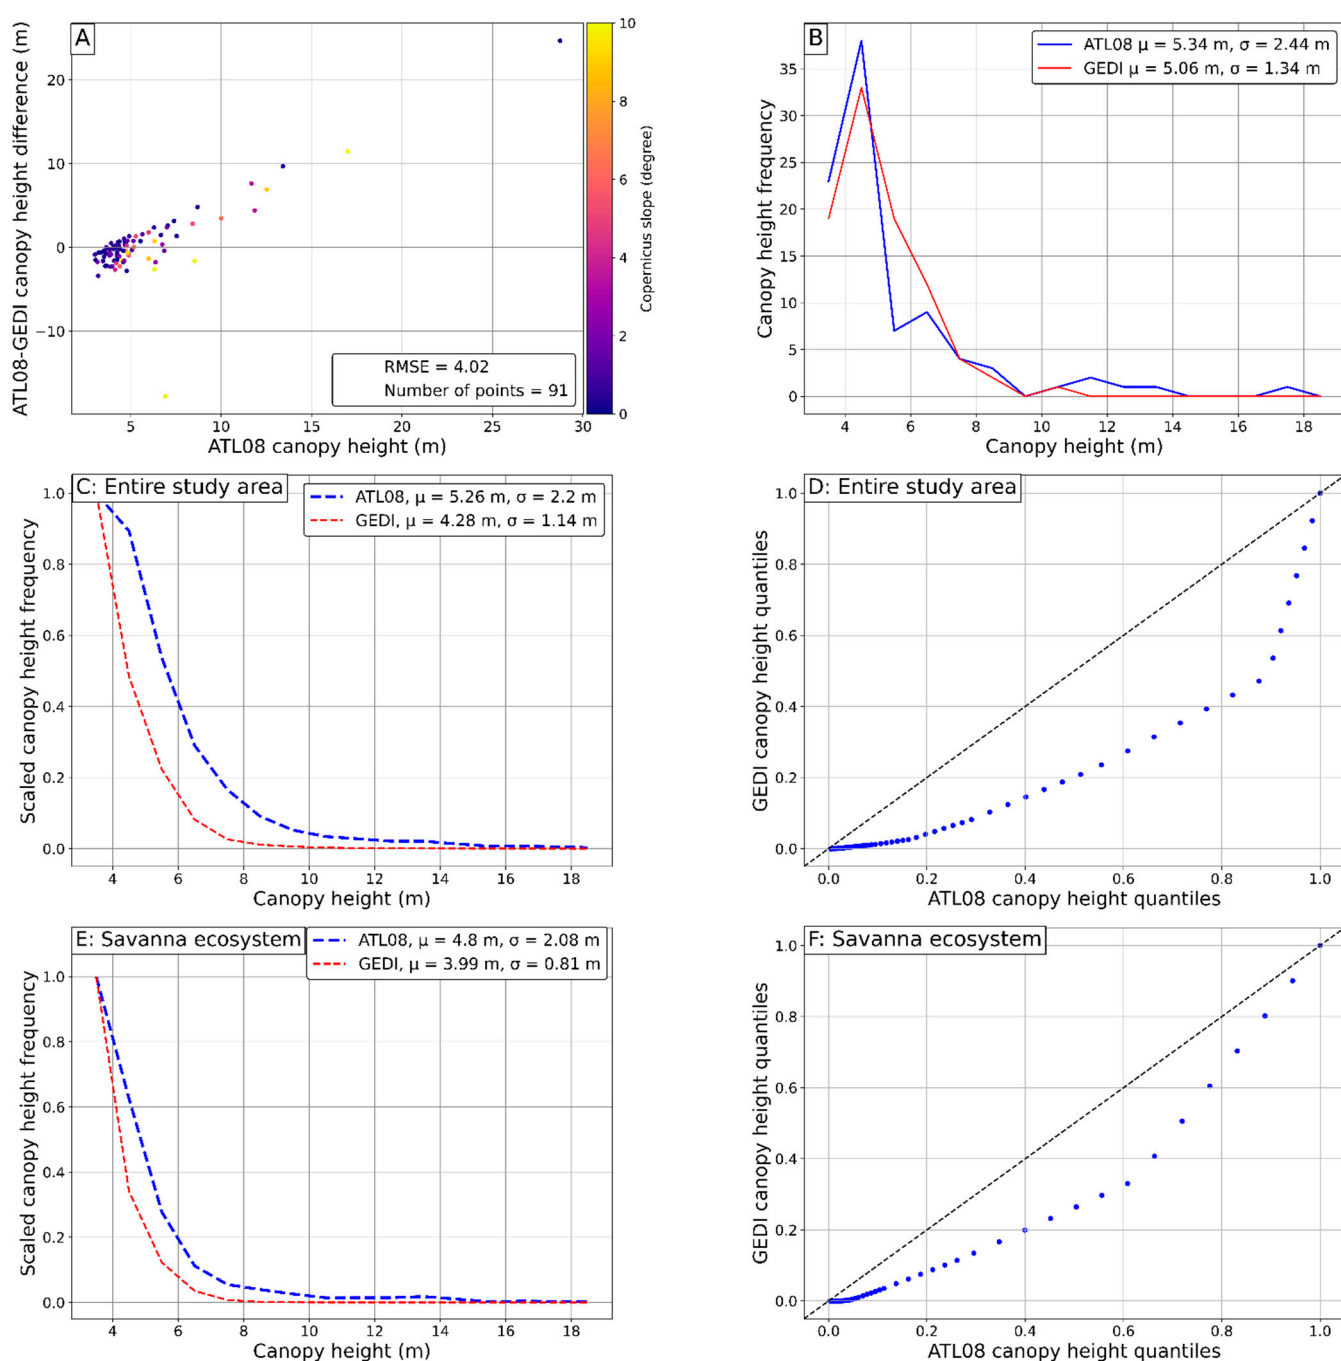

**Figure S6.** GEDI L2A version 2 and ATL08 canopy height relationship (A) GEDI L2A version 2 and ATL08 canopy height difference of the 91 overlapping measurements within a buffer of 5 m. (B) ATL08 and GEDI L2A distributions of the 91 overlapping measurements within a buffer of 5 m. (C+E) ATL08 and GEDI L2A full canopy height distributions in the study areas shown red and blue polygons in Figure 1B+C and Figure 2 in the main manuscript. (D+F) Quantile-quantile plots of ATL08 and GEDI L2A canopy height in the study areas. GEDI L2A canopy heights are generally lower than ATL08 canopy heights.

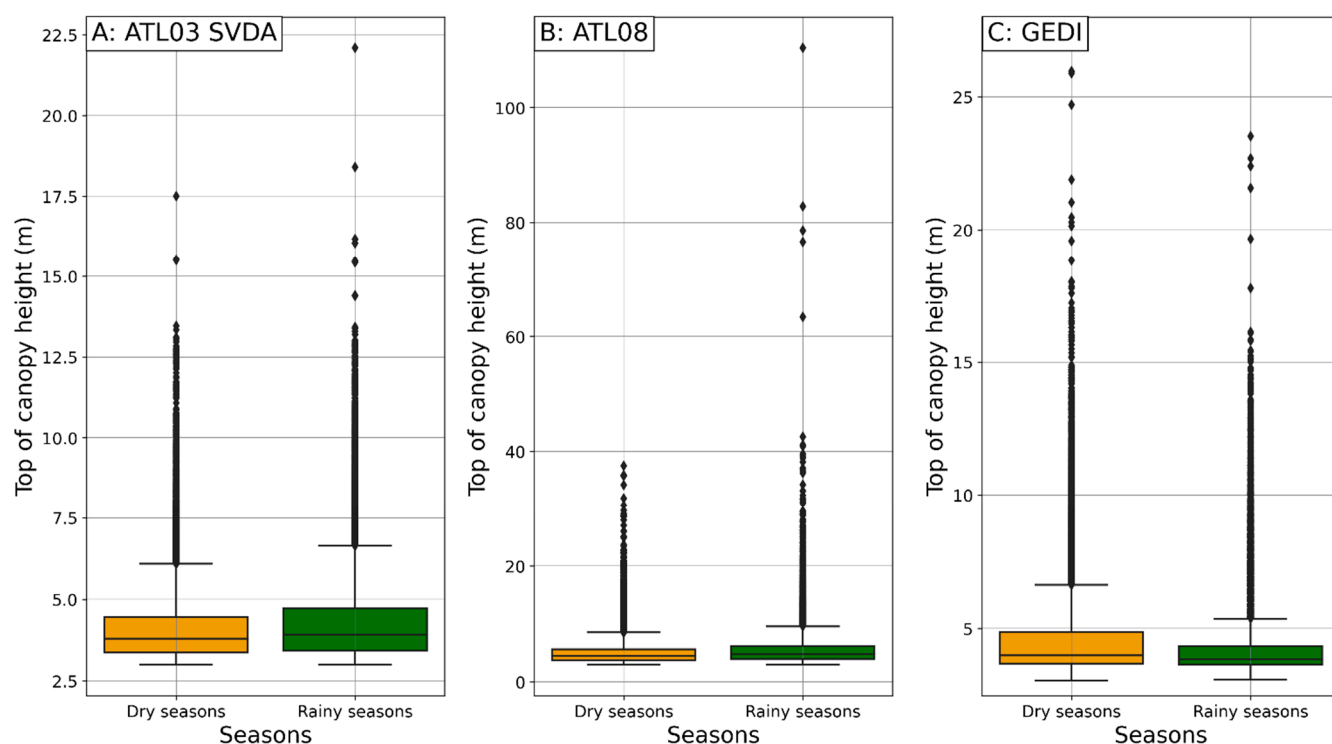

**Figure S7.** (A) Tree height seasonal changes from ATL03 SVDA. (B) Tree height seasonal changes from ATL08. (C) Tree height seasonal changes from GEDI L2A.

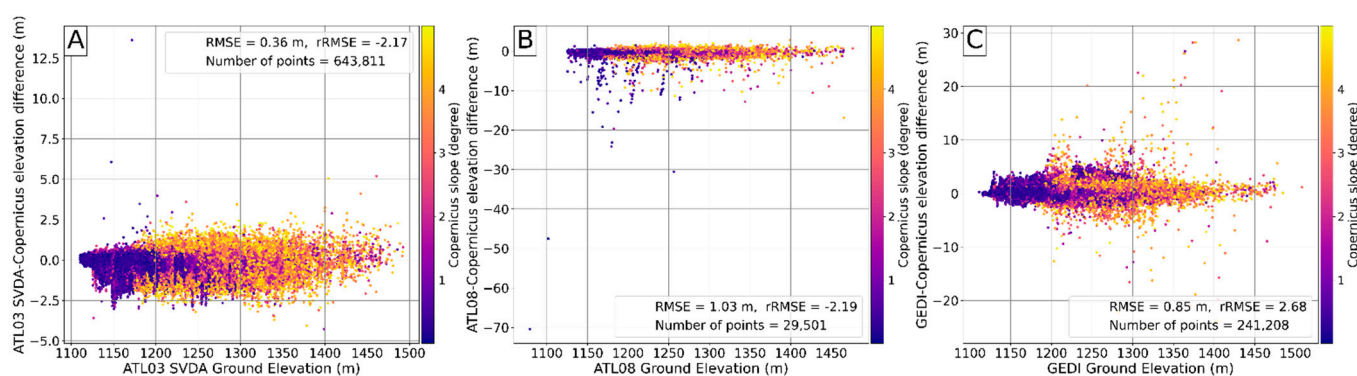

**Figure S8.** Ground height validation with Copernicus DEM in low terrain slope (terrain slope below 5 degrees). (A): Copernicus DEM elevation and ATL03 SVDA based on ATL03 ground height measurements difference as described in section 3.6.1. (B): Copernicus DEM elevation and ATL08 ground height difference. We note that two ATL08 ground height points resulted in points resulted in a difference more than 40 m compared to the ground elevation from Copernicus. (C): Copernicus DEM elevation and GEDI difference.
